# Supplementary material for: Assessing the Activity of Individual Group-Housed Broilers Throughout Life Using a Passive Radio Frequency Identification System—A Validation Study
Source: PubMed Central journal article supplement (PMC7374484; doi:10.3390/s20133612), 2020-06-27
Supplement: sensors-20-03612-s001.pdf [file sensors-20-03612-s001.pdf]

**Table S1.** Intra-observer reliability scores for every observer.

| <b>Observer</b> | <b>Subjects</b> | <b>Raters</b> | <b>Kappa</b> | <b>Z</b> | <b>p-value</b> |
|-----------------|-----------------|---------------|--------------|----------|----------------|
| 1               | 95              | 2             | 0.988        | 29.3     | <0.001         |
| 2               | 96              | 2             | 0.977        | 29.6     | <0.001         |
| 3               | 95              | 2             | 0.929        | 27.5     | <0.001         |
| 4               | 94              | 2             | 0.753        | 23.6     | <0.001         |
| 5               | 83              | 2             | 0.879        | 24.9     | <0.001         |
| 6               | 95              | 2             | 0.953        | 28.5     | <0.001         |
| 7               | 95              | 2             | 0.929        | 27.7     | <0.001         |
| 8               | 92              | 2             | 0.951        | 27.5     | <0.001         |
| 9               | 96              | 2             | 0.907        | 27.4     | <0.001         |
| 10              | 93              | 2             | 0.952        | 27.8     | <0.001         |
| 11              | 95              | 2             | 0.976        | 29.1     | <0.001         |
| 12              | 98              | 2             | 0.887        | 27.9     | <0.001         |
